# Supplementary material for: Alisol B 23-acetate attenuates CKD progression by regulating the renin–angiotensin system and gut–kidney axis
Source: PubMed Central journal article supplement — Ther Adv Chronic Dis. 2020 May 20;11:2040622320920025. doi: 10.1177/2040622320920025 (PMC7249553; doi:10.1177/2040622320920025), 2020-05-20
Supplement: Supplemantary_Material_0.2.pdf [file Supplemantary_Material_0.2.pdf]

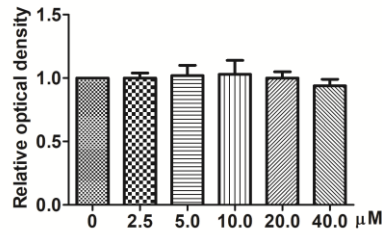

**Supplementary Figure 1.** Cell viability was determined after treatment with ABA on NRK-52E cells at different concentrations for 24 h. ABA did not affect the viability and cell proliferation. Data are expressed as means±SD, n = 6.

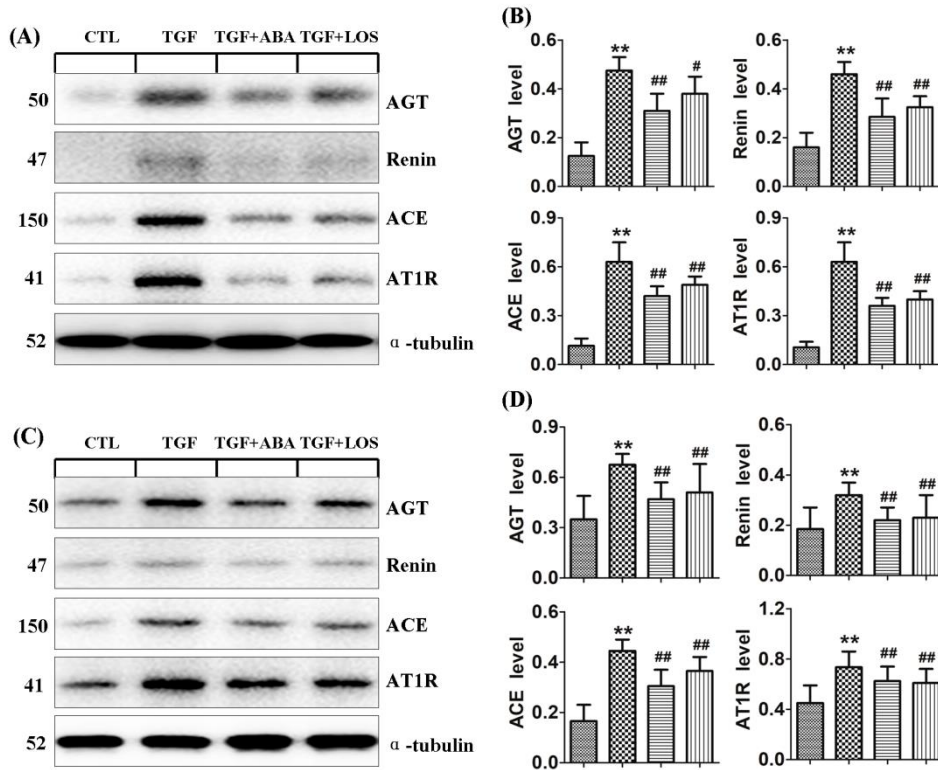

**Supplementary Figure 2.** ABA reduces the activation of RAS. (A and B) TGF increases the expression of AGT, renin, ACE and AT1R, while treatment with ABA significantly inhibits the expression of RAS components in NRK-52E cells. (C and D) TGF results in the upregulation of AGT, renin, ACE and AT1R protein, while treatment with ABA significantly decreases these proteins in NRK-49F cells. CTL, control. TGF, TGF-β1. \*P<0.05; \*\*P<0.01 versus CTL group. #P<0.05; ##P<0.01 versus TGF group.

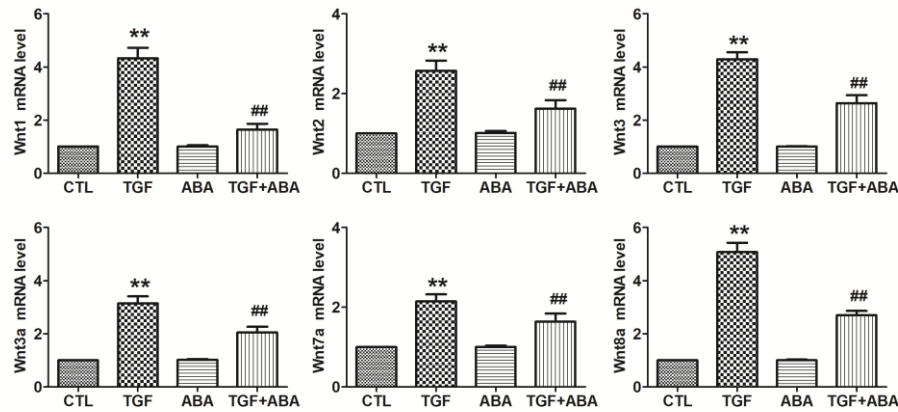

**Supplementary Figure 3.** RT-PCR demonstrates mRNA expressions of various Wnts in TGF- $\beta$ 1-treated NRK-49F cells. ABA treatment significantly reduced mRNA expression of Wnt1, Wnt2, Wnt3, Wnt3a, Wnt7a and Wnt8a in TGF- $\beta$ 1-treated NRK-49F cells. CTL, control. TGF, TGF- $\beta$ 1. \*P<0.05; \*\*P<0.01 versus CTL group. #P<0.05; ##P<0.01 versus TGF group.

**Supplementary Table 1.** Primers for qRT-PCR.

| Gene          | Forward                | Reverse                  | Product size |
|---------------|------------------------|--------------------------|--------------|
| vimentin      | CTTCCCTGAACCTGAGAGAAAC | GTCTCTGGTTTCAACCGTCTTA   | 98           |
| E-cadherin    | GAGGTCTTTGAGGGATCTGTTG | GGCAGCATTTGATAGGTGTTTATG | 105          |
| collagen1     | ACTGGTACATCAGCCCAAAC   | GGAACCTTCGCTTCCATACTC    | 98           |
| $\alpha$ -SMA | AGGGAGTGATGGTTGGAATG   | GGTGATGATGCCGTGTTCTA     | 110          |
| FN            | GTGATCTACGAGGGACAGC    | GCTGGTGGTGAAGTCAAAG      | 78           |
| FSP1          | AGGAGGCCCTGGATGTAATA   | CTCCTTGAGCTCTGTCTTGTTTC  | 92           |
| Wnt1          | CATCGTGAACATAGCCTCCTC  | ATCAGTCGTCGCTGCTTG       | 108          |
| Wnt2          | GCCTTTGTTTACGCCATCTC   | GATCGCAGGAACAGGACTTTA    | 91           |
| Wnt3          | GCAAATGCCATGGGTTGTC    | CGTACTTGTCCTTGAGGAAGTC   | 99           |
| Wnt3a         | TGCAAATGCCACGGACTAT    | GGTGTCTTCTCTACCACCATCTC  | 133          |
| Wnt7a         | GATCCTGGAGGAGAACATGAAA | GTAGCCTAGCTCTCGGAATTG    | 109          |
| Wnt8a         | CATGTACGCTGTCACCAAGA   | CCACCTGCTTTCCATTATTTG    | 84           |
| GAPDH         | ACTCCATTCTTCCACCTTTG   | CCCTGTTGCTGTAGCCATATT    | 105          |
